# Supplementary material for: Homo- and heterometallic complexes of Zn(ii), {Zn(ii)Au(i)}, and {Zn(ii)Ag(i)} with pentadentate Schiff base ligands as promising anticancer agents
Source: Royal Society of Chemistry journal article supplement (doi:10.1039/d3dt01749d), 2023-01-01
Supplement: d3dt01749d1.pdf [file d3dt01749d1.pdf]

## SUPPLEMENTARY MATERIAL

### Homo- and heterometallic complexes of Zn(II), {Zn(II)Au(I)}, and {Zn(II)Ag(I)} with pentadentate Schiff base ligands as promising anticancer agents

Tania Zhivkova,<sup>†a</sup> Daniela C. Culita,<sup>†b</sup> Abedulkadir Abudalleh,<sup>a</sup> Lora Dyakova,<sup>c</sup>  
Teodora Mocanu,<sup>b</sup> Augustin M. Madalan,<sup>d</sup> Milena Georgieva,<sup>e</sup> George Miloshev,<sup>e</sup>  
Anamaria Hanganu,<sup>d,f</sup> Gabriela Marinescu,<sup>\*b</sup> Radostina Alexandrova<sup>\*a</sup>

<sup>a</sup>*Institute of Experimental Morphology, Pathology and Anthropology with Museum, Bulgarian Academy of Sciences, Acad. Georgi Bonchev Str., Bl. 25, Sofia 1113, Bulgaria*

<sup>b</sup>*lie Murgulescu Institute of Physical Chemistry, Romanian Academy, Splaiul Independentei 202, 060021 Bucharest, Romania*

<sup>c</sup>*Institute of Neurobiology, Bulgarian Academy of Sciences, Acad. Georgi Bonchev Str., Bl. 23, Sofia 1113, Bulgaria*

<sup>d</sup>*Faculty of Chemistry, University of Bucharest, Regina Elisabeta Blvd. 4-12, 030018 Bucharest, Romania*

<sup>e</sup>*Institute of Molecular Biology "Roumen Tsanev", Acad. Georgi Bonchev Str., Bl. 21, Sofia 1113, Bulgaria*

<sup>f</sup>*"C.D. Nenitzescu" Institute of Organic and Supramolecular Chemistry of the Romanian Academy, Splaiul Independentei 202B, Bucharest, Romania*

<sup>†</sup> Both authors contributed equally to the manuscript.

<sup>\*</sup>Corresponding authors: [gmarinescu@icf.ro](mailto:gmarinescu@icf.ro) (Gabriela Marinescu); [rialexandrova@hotmail.com](mailto:rialexandrova@hotmail.com) (Radostina Alexandrova)

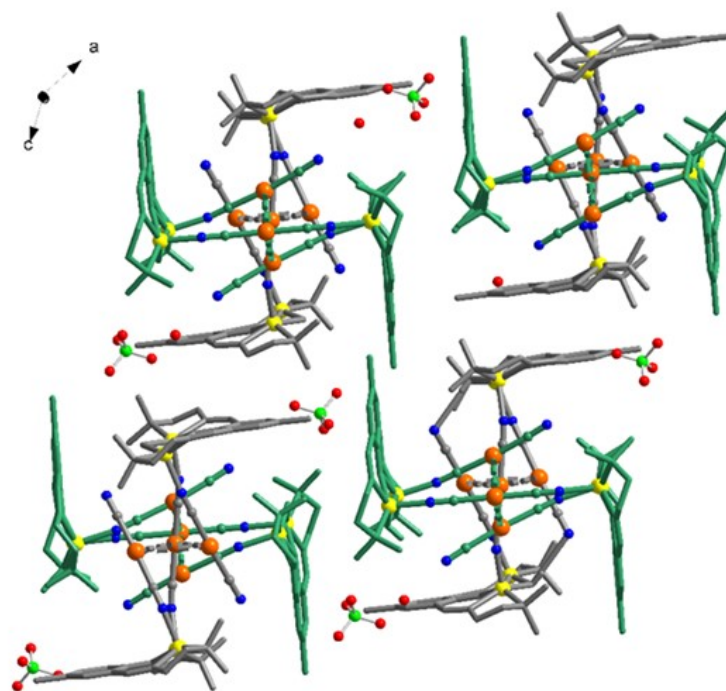

**Figure S1.** Detail of the crystal packing diagram in compound **ZndmenAu** (the two crystallographic independent heptanuclear units are colored in grey and green).

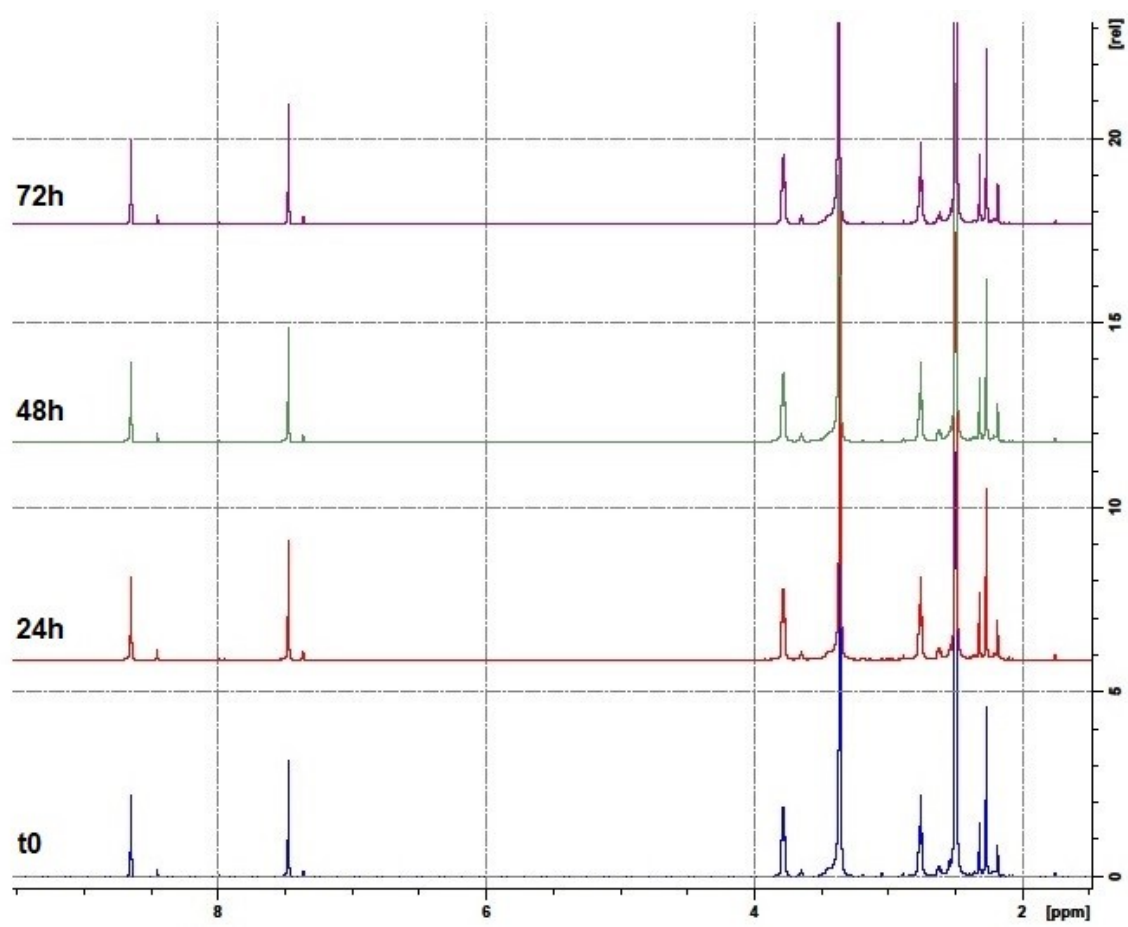

**Figure S2.**  $^1\text{H}$  NMR ( $\text{DMSO-d}_6$ ) spectra of **ZndmenAu** at  $t_0$ , 24, 48, and 72h.

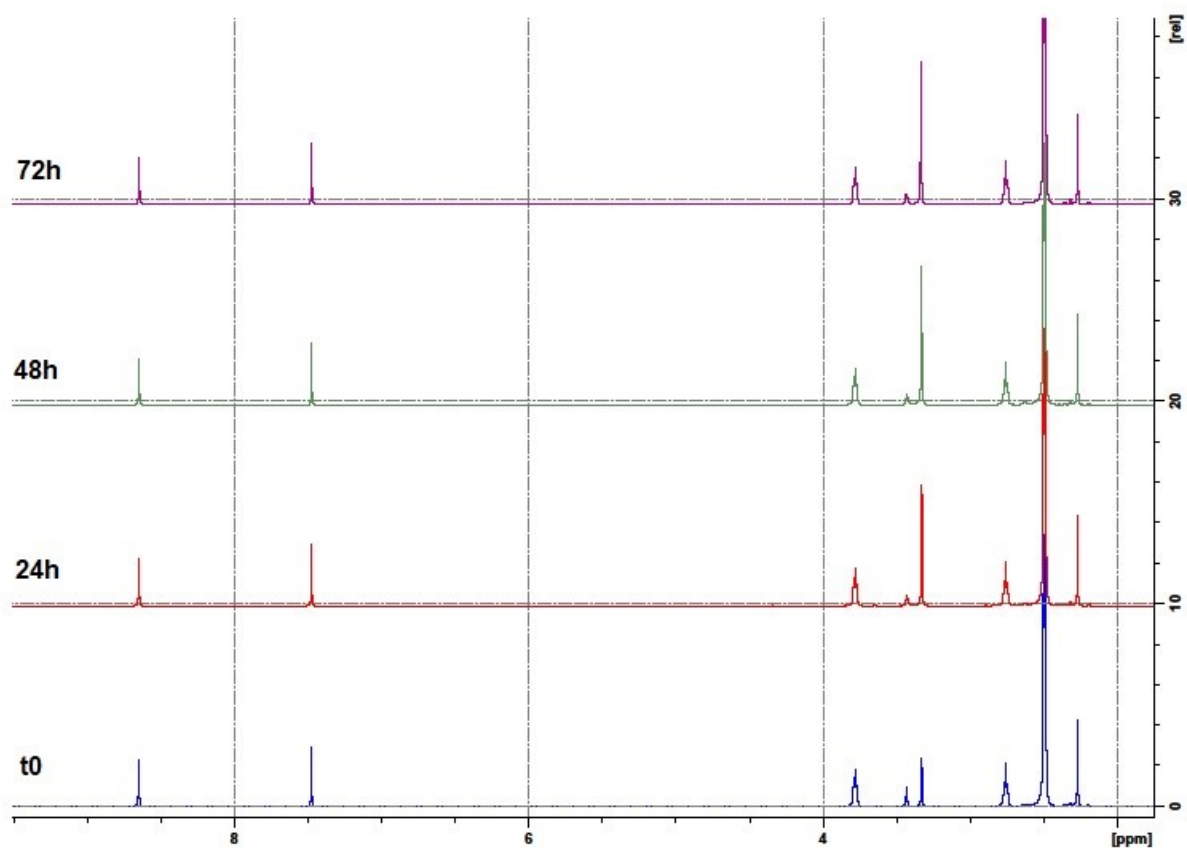

Figure S3. <sup>1</sup>H NMR (DMSO-d<sub>6</sub>) spectra of ZndmenAg at t<sub>0</sub>, 24, 48, and 72h.

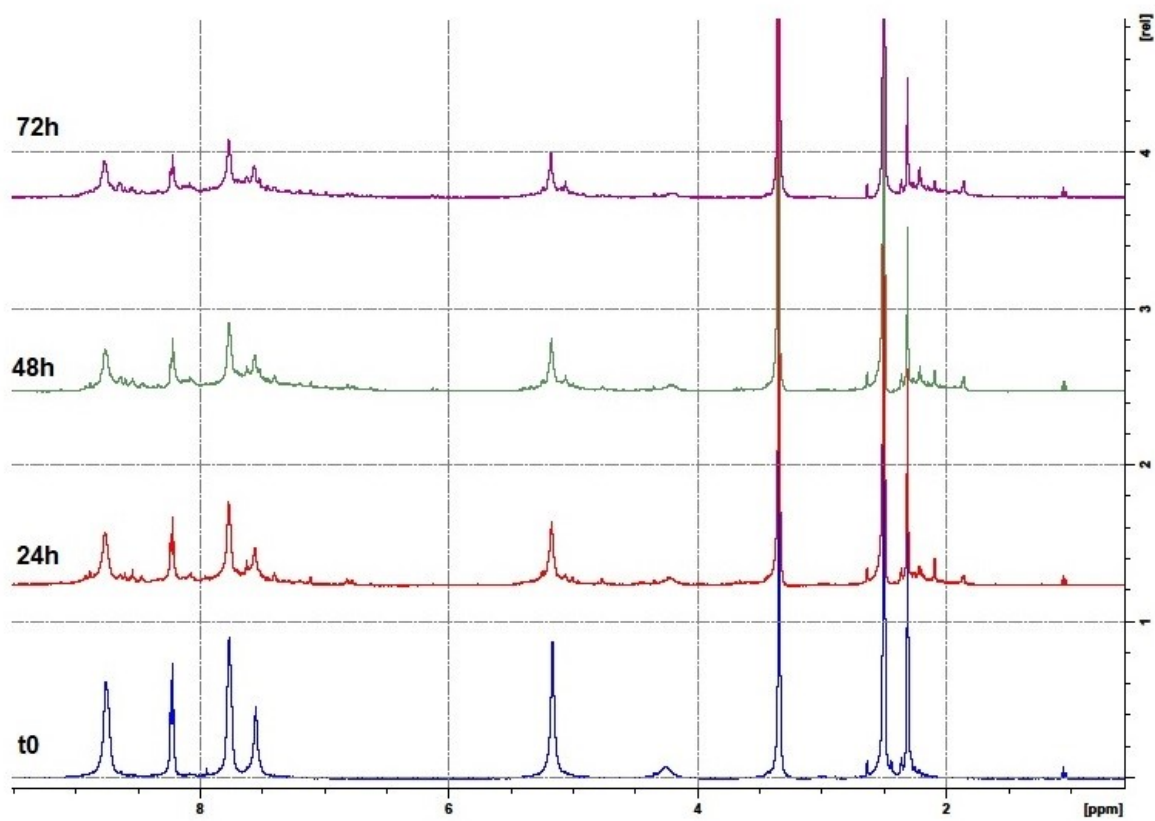

Figure S4. <sup>1</sup>H NMR (DMSO-d<sub>6</sub>) spectra of ZnampyAu at t<sub>0</sub>, 24, 48, and 72h.

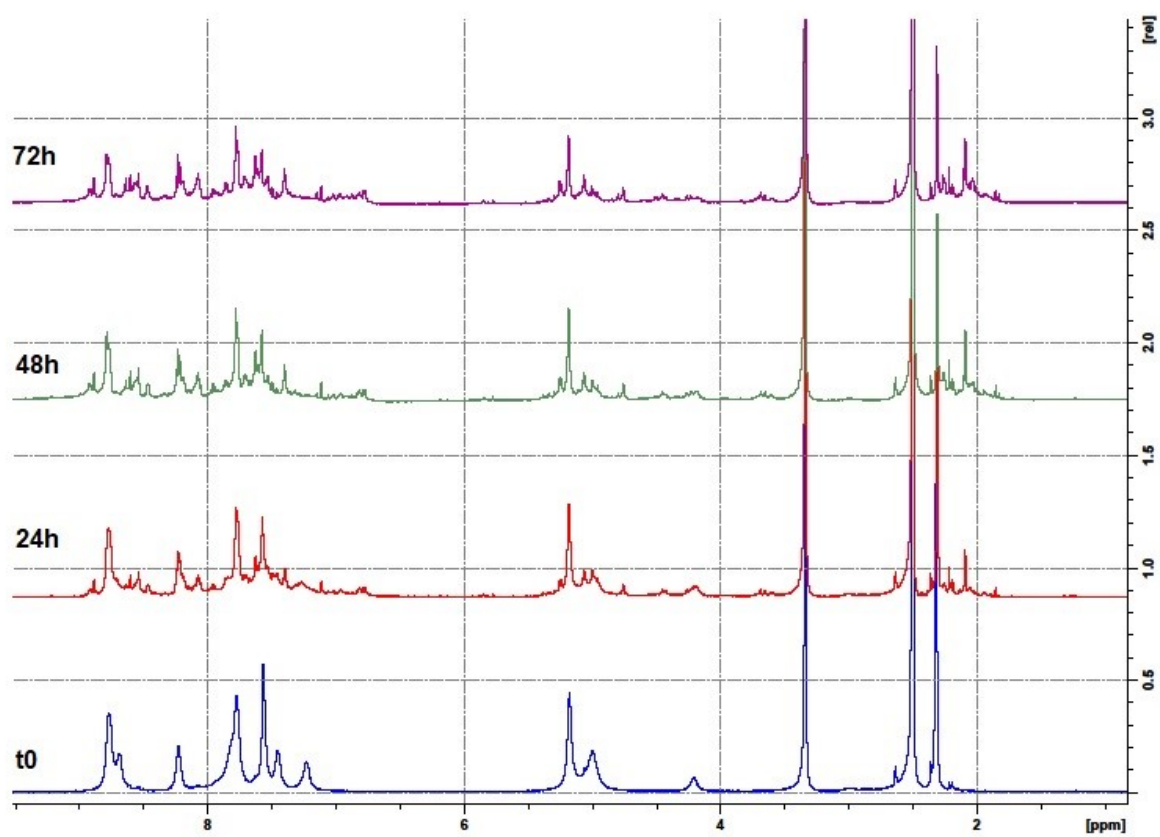

Figure S5. <sup>1</sup>H NMR (DMSO-d<sub>6</sub>) spectra of Znampy at t<sub>0</sub>, 24, 48, and 72h.

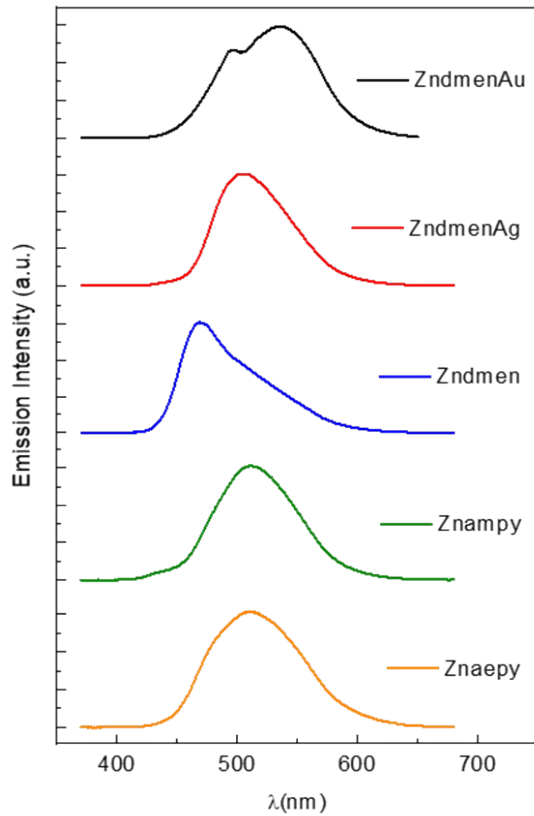

**Figure S6.** Solid-state emission spectra of **Zn dmen**, **Zn nampy**, **Zn naepy**, **Zn dmenAg**, and **Zn dmenAu** at room temperature ( $\lambda_{exc} = 350$  nm).

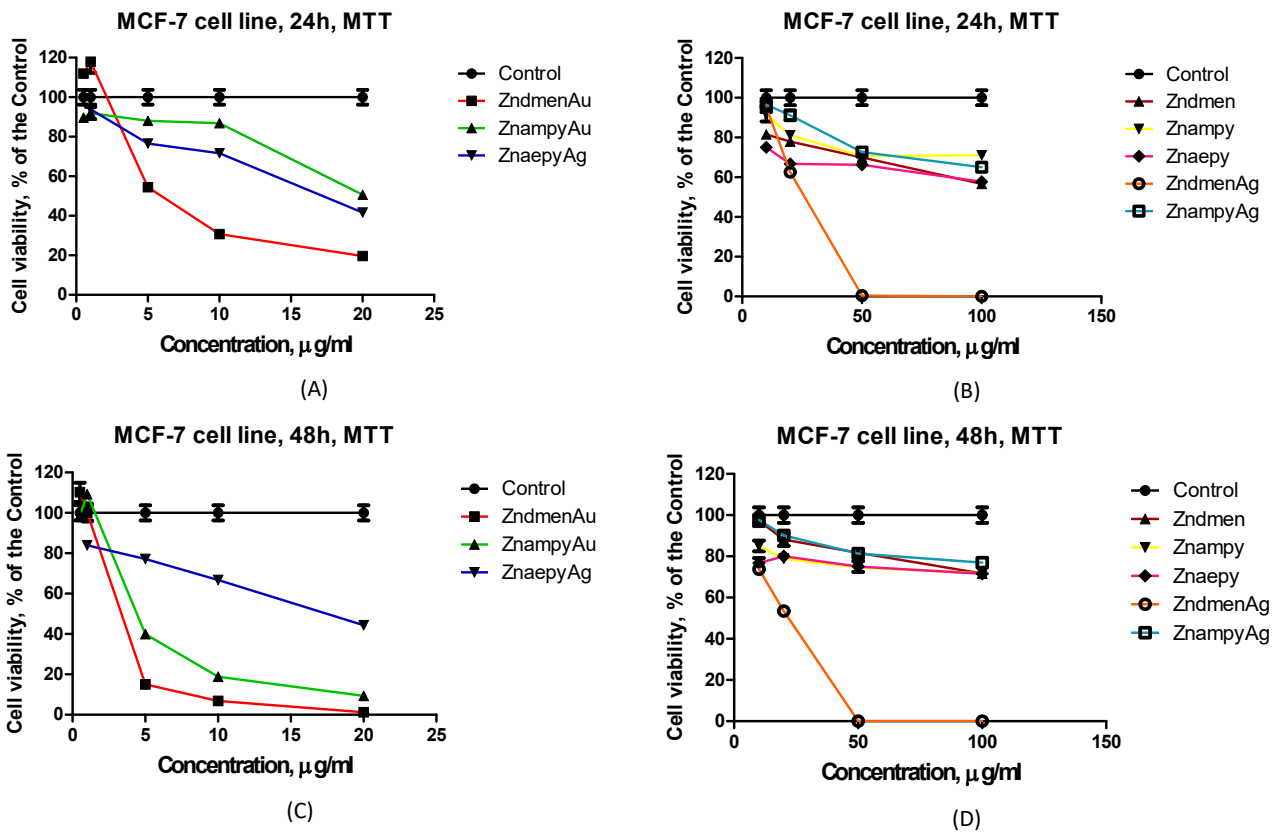

**Figure S7.** Concentration-response curves of investigated complexes for luminal A breast cancer MCF-7 cells evaluated by MTT test after 24 h (A, B) and 48 h (C, D) treatment period.

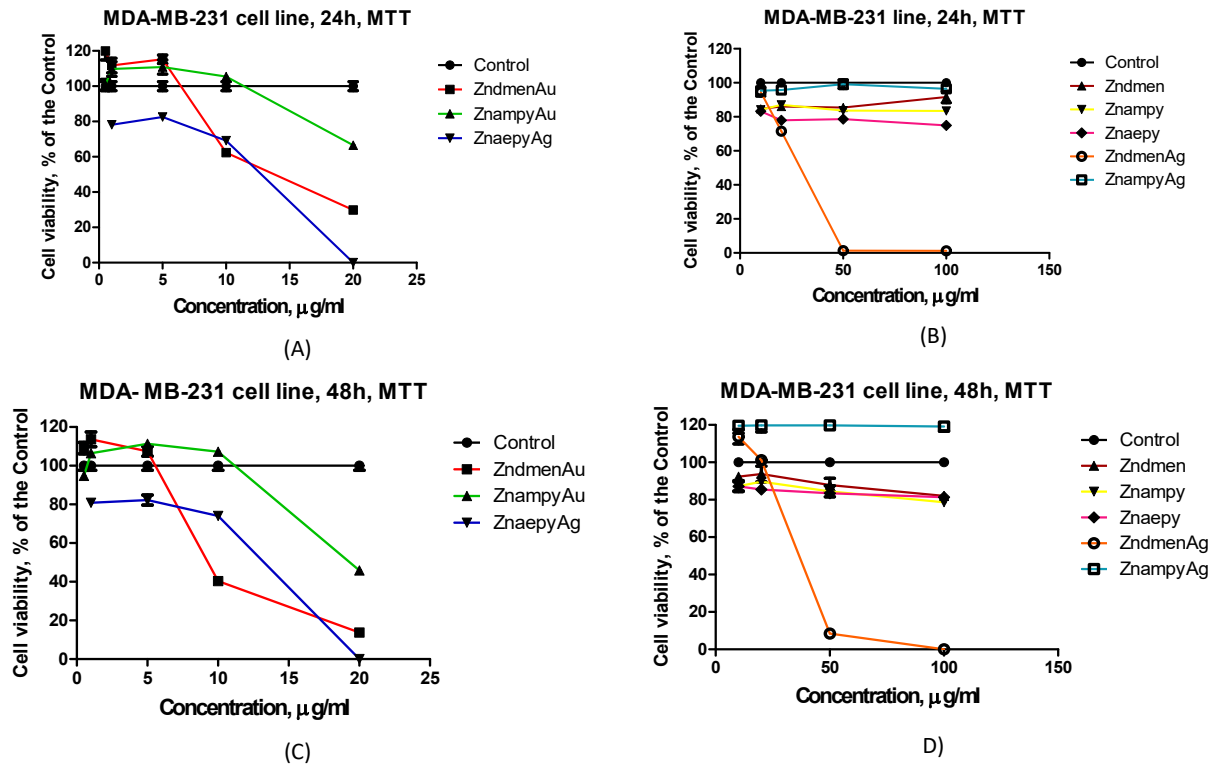

**Figure S8.** Concentration-response curves of investigated complexes for triple negative breast cancer MDA-MB-231 cells evaluated by MTT test after 24 h (A, B) and 48 h (C, D) treatment period.

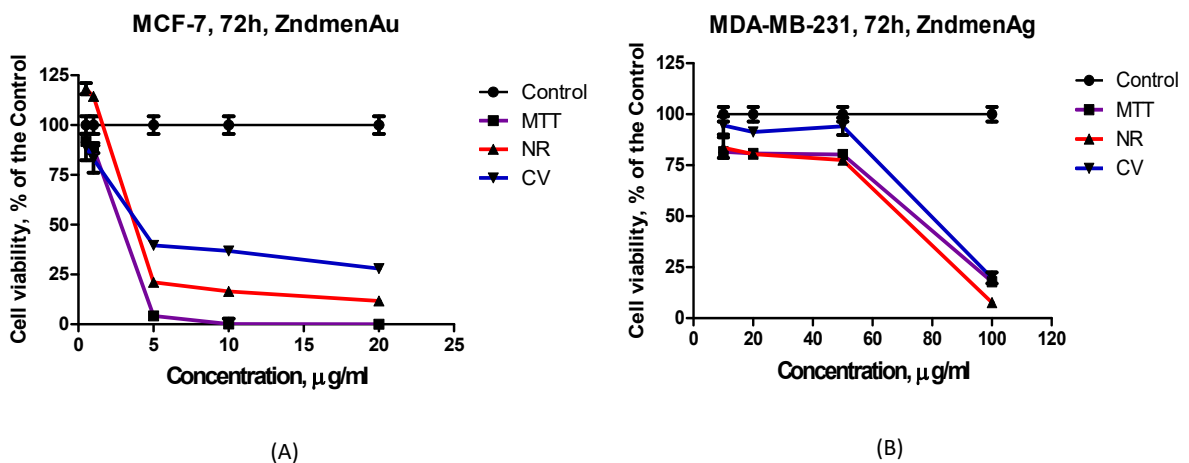

**Figure S9.** Comparison between three different cytotoxicity assays (MTT, NR, and CV) after 72h of treatment with (0.1-20  $\mu\text{g/ml}$ ) **ZndmenAu** on MCF-7 (A); **ZndmenAg** (10 - 100  $\mu\text{g/ml}$ ) on MDA-MB-231 cells (B): representative curves.





**Table S2.** Cytotoxic activity ( $CC_{50}$  and  $CC_{90}$ ,  $\mu\text{M}$ ) of the investigated complexes on cultured MCF-7 cells.

| Cell line       | MCF-7                              |                                    |                                  |                 |
|-----------------|------------------------------------|------------------------------------|----------------------------------|-----------------|
|                 | MTT                                |                                    | NR                               | CV              |
|                 | 24 h                               | 48 h                               | 72 h                             | 72 h            |
| <b>Znampy</b>   | n.d.                               | n.d.                               | (-)                              | n.d.            |
| <b>ZnampyAg</b> | n.d.                               | n.d.                               | n.d.                             | n.d.            |
| <b>ZnampyAu</b> | 30.5 $\pm$ 0.2<br>(n.d.)           | 2.7 $\pm$ 0.9<br>(11.5 $\pm$ 0.7)  | 3.6 $\pm$ 2.1<br>(6.1 $\pm$ 1.8) | 5.3 $\pm$ 1.7   |
| <b>Zndmen</b>   | n.d.                               | n.d.                               | (-)                              | n.d.            |
| <b>ZndmenAg</b> | 36.8 $\pm$ 3.5<br>(63.8 $\pm$ 5.9) | 30.7 $\pm$ 4.8<br>(62.3 $\pm$ 4.9) | n.d.                             | 123.7 $\pm$ 5.6 |
| <b>ZndmenAu</b> | 3.4 $\pm$ 1.5<br>(n.d.)            | 2.2 $\pm$ 1.8                      | 2.1 $\pm$ 2.1<br>(n.d.)          | 2.3 $\pm$ 2.0   |
| <b>Znaepy</b>   | n.d.                               | n.d.                               | (-)                              | n.d.            |
| <b>ZnaepyAg</b> | 20.1 $\pm$ 4.4                     | 20.4 $\pm$ 3.1                     | (-)                              | 7.8 $\pm$ 1.0   |

$CC_{50}$  and  $CC_{90}$  concentrations (in brackets); results are obtained by MTT test (MTT), NR uptake cytotoxicity assay (NR) and CV staining technique (CV) after 24, 48, and 72 h of treatment; n.d. (not determined) marked the cases in which  $CC_{50}$  and  $CC_{90}$  were not calculated because the viability of the cells is  $>50\%$  and respectively  $>10\%$ ; (-) = no data.

**Table S3.** Cytotoxic activity ( $CC_{50}$  and  $CC_{90}$ ,  $\mu\text{M}$ ) of the investigated complexes on cultured MDA-MB-231 cells.

| Cell line       | MDA-MB-231                         |                                    |                                  |                                   |
|-----------------|------------------------------------|------------------------------------|----------------------------------|-----------------------------------|
|                 | MTT                                |                                    | NR                               | CV                                |
|                 | 24 h                               | 48 h                               | 72 h                             | 72 h                              |
| <b>Znampy</b>   | n.d.                               | n.d.                               | (-)                              | 256.6 $\pm$ 3.5                   |
| <b>ZnampyAg</b> | n.d.                               | n.d.                               | n.d.                             | n.d.                              |
| <b>ZnampyAu</b> | n.d.                               | n.d.                               | 6.1 $\pm$ 2.2<br>(n.d.)          | 8.2 $\pm$ 3.7                     |
| <b>Zndmen</b>   | n.d.                               | n.d.                               | (-)                              | 235 $\pm$ 2.7                     |
| <b>ZndmenAg</b> | 41.1 $\pm$ 3.2<br>(65.2 $\pm$ 1.7) | 51.0 $\pm$ 5.9<br>(69.2 $\pm$ 4.9) | n.d.                             | 112.4 $\pm$ 5.9                   |
| <b>ZndmenAu</b> | 7.8 $\pm$ 1.4                      | 5.2 $\pm$ 1.5<br>(n.d.)            | 2.7 $\pm$ 1.7<br>(5.2 $\pm$ 1.6) | 1.8 $\pm$ 1.9                     |
| <b>Znaepy</b>   | n.d.                               | n.d.                               | (-)                              | 162.8 $\pm$ 7.1                   |
| <b>ZnaepyAg</b> | 14.8 $\pm$ 5.9<br>(21.3 $\pm$ 5.3) | 15.3 $\pm$ 4.2                     | (-)                              | 8.2 $\pm$ 5.6<br>(18.8 $\pm$ 4.2) |

$CC_{50}$  and  $CC_{90}$  concentrations (in brackets); results are obtained by MTT test (MTT), NR uptake cytotoxicity assay (NR) and CV staining technique (CV) after 24, 48, and 72 h of treatment; n.d. (not determined) marked the cases in which  $CC_{50}$  and  $CC_{90}$  were not calculated because the viability of the cells is  $>50\%$  and respectively  $>10\%$ ; (-) = no data.

**Table S4.** Cytotoxic activity (CC<sub>50</sub> and CC<sub>90</sub>, μM) of the investigated complexes on cultured HeLa cells.

| Cell line       | HeLa                       |                             |                             |                            |
|-----------------|----------------------------|-----------------------------|-----------------------------|----------------------------|
|                 | MTT                        |                             | NR                          | CV                         |
|                 | 24 h                       | 48 h                        | 72 h                        | 72 h                       |
| <b>Znampy</b>   | 157.9                      | 98.7 ± 2.2<br>(145.1 ± 5.2) | 86.2 ± 2.6<br>(137.3 ± 2.5) | 112.6 ± 3.6                |
| <b>ZnampyAg</b> | 43.6 ± 0.3<br>(121 ± 0.8)  | 16.0 ± 1.5<br>(43.6 ± 1.8)  | 7.9 ± 0.8<br>(22.3 ± 1.5)   | 9.8 ± 2.0<br>(19.3 ± 2.6)  |
| <b>ZnampyAu</b> | 3.0 ± 0.9                  | 0.6 ± 0.3<br>(0.9 ± 0.5)    | 0.3 ± 1.3<br>(2.9 ± 1.4)    | 1.0 ± 0.4<br>(2.4 ± 0.7)   |
| <b>Zndmen</b>   | n.d.                       | n.d.                        | n.d.                        | n.d.                       |
| <b>ZndmenAg</b> | 15.9 ± 1.7<br>(26.8 ± 1.8) | 13.2 ± 3.5<br>(25.4 ± 2.5)  | 11.8 ± 3.0<br>(23.9 ± 3.9)  | 12.3 ± 2.4<br>(25.5 ± 2.8) |
| <b>ZndmenAu</b> | 2.6 ± 1.6<br>(20.3 ± 2.3)  | 0.7 ± 1.7<br>(2.7 ± 1.4)    | 0.6 ± 1.4<br>(2.4 ± 1.3)    | 1.2 ± 0.9<br>(8.2 ± 1.4)   |
| <b>Znaepy</b>   | n.d.                       | n.d.                        | n.d.                        | n.d.                       |
| <b>ZnaepyAg</b> | 6.9 ± 0.8<br>(18.8 ± 1.4)  | 4.2 ± 2.4<br>(8.2 ± 2.9)    | 5.2 ± 3.7<br>(10.1 ± 3.2)   | 7.2 ± 3.1<br>(10.8 ± 3.5)  |

CC<sub>50</sub> and CC<sub>90</sub> concentrations (in brackets); results are obtained by MTT test (MTT), NR uptake cytotoxicity assay (NR) and CV staining technique (CV) after 24, 48, and 72h of treatment; n.d. (not determined) marked the cases in which CC<sub>50</sub> and CC<sub>90</sub> were not calculated because the viability of the cells is >50% and respectively >10%.

**Table S5.** Cytotoxic activity (CC<sub>50</sub> and CC<sub>90</sub>, μM) of the investigated complexes on cultured Lep-3 cells.

| Cell line       | Lep-3                      |                            |
|-----------------|----------------------------|----------------------------|
|                 | NR                         | CV                         |
|                 | 72 h                       | 72 h                       |
| <b>Znampy</b>   | 45.0 ± 4.9<br>(66.5 ± 5.8) | 36.1 ± 5.4<br>(66.0 ± 3.9) |
| <b>ZnampyAg</b> | 9.0 ± 1.7<br>(12.0 ± 1.3)  | 9.0 ± 2.0<br>(12.0 ± 2.6)  |
| <b>ZnampyAu</b> | 0.4 ± 0.8<br>(0.5 ± 1.3)   | 0.3 ± 1.8<br>(0.5 ± 1.3)   |
| <b>Zndmen</b>   | 23.4 ± 2.9<br>(62.1 ± 1.8) | 20.5 ± 4.6<br>(29.6 ± 3.9) |
| <b>ZndmenAg</b> | 8.3 ± 2.6<br>(12.7 ± 2.9)  | 7.9 ± 0.7<br>(13.1 ± 3.2)  |
| <b>ZndmenAu</b> | 0.9 ± 1.1<br>(2.7 ± 1.8)   | 1.9 ± 0.8<br>(2.7 ± 0.9)   |
| <b>Znaepy</b>   | 28.7 ± 3.7<br>(61.5 ± 3.3) | 20.9 ± 2.5<br>(29.0 ± 2.0) |
| <b>ZnaepyAg</b> | 3.3 ± 1.9<br>(5.6 ± 2.4)   | 3.3 ± 3.0<br>(5.6 ± 2.2)   |

CC<sub>50</sub> and CC<sub>90</sub> concentrations (in brackets); results are obtained by NR uptake cytotoxicity assay (NR) and CV staining technique (CV) after 72 h of treatment.

**Table S6.** Cytotoxic activity ( $CC_{50}$  and  $CC_{90}$ ,  $\mu\text{M}$ ) of cisplatin on viability and proliferation of treated tumor and non-tumor cells.

| Cell line         | Cisplatin   |             |                 |                 |                 |                 |
|-------------------|-------------|-------------|-----------------|-----------------|-----------------|-----------------|
|                   | 24 h        |             | 48 h            |                 | 72 h            |                 |
|                   | MTT         | NR          | MTT             | NR              | MTT             | NR              |
| <b>MCF-7</b>      | n.d.        | n.d.        | 154.1<br>(n.d.) | 166.0<br>(n.d.) | 92.0<br>(n.d.)  | 99.6<br>(n.d.)  |
| <b>MDA-MB-231</b> | n.d.        | n.d.        | 54.3<br>(n.d.)  | 82.6<br>(n.d.)  | 51.6<br>(132.9) | 60.0<br>(152.1) |
| <b>HeLa</b>       | 99.6<br>(-) | 85.9<br>(-) | 21.9<br>(55.5)  | 38.5<br>(61.0)  | 28.0<br>(62.9)  | 19.9<br>(56.6)  |
| <b>Lep-3</b>      | n.d.        | 70.0        | 27.5<br>(93.2)  | 17.6<br>(32.2)  | 1.6<br>(29.5)   | (-)             |

$CC_{50}$  and  $CC_{90}$  concentrations (in brackets) are obtained by MTT test (MTT) and NR uptake cytotoxicity assay (NR) after 24, 48, and 72 h of treatment; n.d. (not determined) marked the cases in which  $CC_{50}$  and  $CC_{90}$  were not calculated because the viability of the cells is  $>50\%$  and respectively  $>10\%$ ; (-) = no data.

**Table S7.** Cytotoxic activity ( $CC_{50}$  and  $CC_{90}$ ,  $\mu\text{M}$ ) of oxaliplatin and epirubicin on viability and proliferation of treated tumor and non-tumor cells.

| Cell line         | Oxaliplatin     |                 |                 | Epirubicin      |                 |                 |
|-------------------|-----------------|-----------------|-----------------|-----------------|-----------------|-----------------|
|                   | 24 h            | 48 h            | 72 h            | 24 h            | 48 h            | 72 h            |
| <b>MCF-7</b>      | n.d.            | 251.7<br>(n.d.) | 111.3<br>(n.d.) | n.d.            | 52.4<br>(n.d.)  | 28.7<br>(n.d.)  |
| <b>MDA-MB-231</b> | n.d.            | 43.7<br>(226.6) | 25.1<br>(238.4) | 131.8<br>(n.d.) | 16.9<br>(184.0) | 16.0<br>(132.3) |
| <b>HeLa</b>       | 170.0<br>(-)    | 38.9<br>(190.7) | 15.4<br>(117.3) | 113.3<br>(-)    | 35.6<br>(128.4) | 31.9<br>(85.7)  |
| <b>Lep-3</b>      | 174.4<br>(n.d.) | 76.8<br>(251.6) | 2.4<br>(125.8)  | n.d.            | 45.8<br>(n.d.)  | 1.4<br>(33.7)   |

$CC_{50}$  and  $CC_{90}$  concentrations (in brackets) are obtained by MTT test (MTT) after 24, 48, and 72 h of treatment; n.d. (not determined) marked the cases in which  $CC_{50}$  and  $CC_{90}$  were not calculated because the viability of the cells is  $>50\%$  and respectively  $>10\%$ ; (-) = no data.
